# Supplementary material
Source: PubMed Central journal article supplement (PMC10326650)

Figure S1. ROC curve analysis of (A) baseline ANC and hemoglobin, (B) baseline IL-6, baseline ferritin and peak ferritin. ROC, receiver operating characteristic; ANC, absolute neutrophil count.

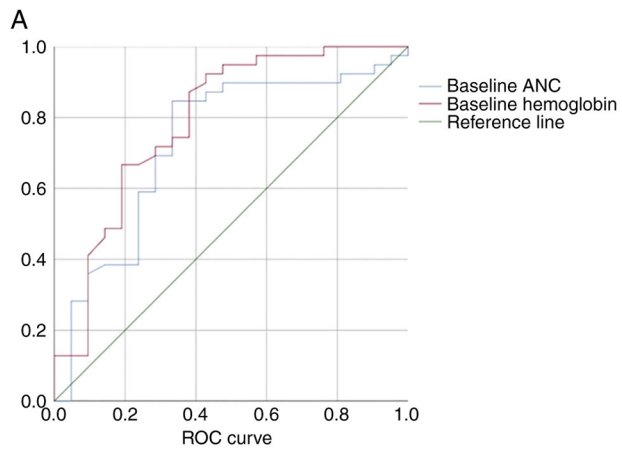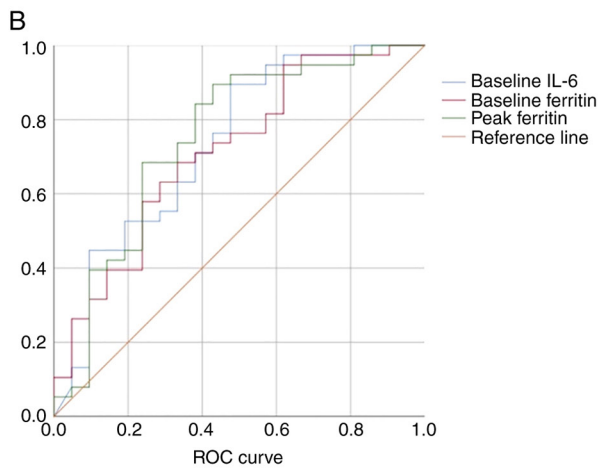

Supplement: Supplementary_Data1.pdf [file Supplementary_Data1.pdf]
