# Supplementary material
Source: PubMed Central journal article supplement (PMC10326650)
Supplement: Supplementary_Data2.pdf [file Supplementary_Data2.pdf]

Table SI. Demographic and clinical characteristics of the patients.

| Characteristic                        | Value      |
|---------------------------------------|------------|
| Age, years                            | 46 (21-72) |
| Gender                                |            |
| Male                                  | 45 (71.42) |
| Female                                | 18 (28.57) |
| Pathology                             |            |
| DLBCL                                 | 47 (74.60) |
| Primary central DLBCL                 | 4 (6.34)   |
| Primary mediastinal DLBCL             | 2 (3.17)   |
| Follicular cell lymphoma              | 5 (7.93)   |
| B-cell lymphoma leukemia              | 4 (6.34)   |
| Mantle cell lymphoma                  | 1 (1.58)   |
| Number of prior chemotherapies, times | 8 (3-26)   |
| Prior allogeneic HSCT                 | 4 (6.34)   |
| Targets of CAR-T cells                |            |
| CD19                                  | 11 (17.46) |
| CD20                                  | 9 (14.28)  |
| CD19-CD20                             | 23 (36.50) |
| CD19-CD22                             | 19 (30.15) |
| CD19-NK                               | 1 (1.58)   |
| Prior bridging therapy                | 9 (14.28)  |
| CRS                                   |            |
| None                                  | 19 (30.15) |
| Grade 1-2                             | 40 (63.49) |
| Grade $\geq 3$                        | 4 (6.34)   |
| NT                                    |            |
| None                                  | 53 (84.12) |
| Grade 1-2                             | 7 (11.11)  |
| Grade $\geq 3$                        | 3 (4.76)   |
| Response                              |            |
| CR                                    | 11 (18.3)  |
| PR                                    | 28 (46.7)  |
| SD                                    | 12 (20)    |
| PD                                    | 9 (15)     |

Values are expressed as the median (range) or n (%). DLBCL, diffuse large B-cell lymphoma; CAR-T, chimeric antigen receptor T-cell; CRS, cytokine release syndrome; NT, neurological toxicity; NK, natural killer; CR, complete response; PR, partial response; SD, stable disease; PD, progressive disease.

Table SII. Analysis of risk factors for neutropenia above grade 3.

| Characteristic                           | Neutropenia group | No neutropenia group | Univariate analysis P |
|------------------------------------------|-------------------|----------------------|-----------------------|
| Gender                                   |                   |                      | 0.195                 |
| Male                                     | 32 (66.66)        | 13 (86.67)           |                       |
| Female                                   | 16 (33.34)        | 2 (13.33)            |                       |
| Age, years                               | 47 (21-72)        | 45 (24-70)           | 0.600                 |
| ECOG score                               | 2 (0-3)           | 1 (0-3)              | 0.026                 |
| Number of prior chemotherapies, times    | 8 (3-24)          | 10 (6-26)            | 0.147                 |
| Prior autologous HSCT                    |                   |                      | 1.000                 |
| Yes                                      | 3 (6.25)          | 1 (6.67)             |                       |
| No                                       | 45 (93.75)        | 14 (93.33)           |                       |
| Bone marrow involvement                  |                   |                      | 0.667                 |
| Yes                                      | 7 (14.5)          | 1 (6)                |                       |
| No                                       | 41 (85.5)         | 14 (94)              |                       |
| Targets of CAR-T cells                   |                   |                      | 0.503                 |
| CD19                                     | 8 (16.67)         | 3 (20)               |                       |
| CD20                                     | 7 (14.58)         | 2 (13.33)            |                       |
| CD19-CD20                                | 17 (35.41)        | 6 (40)               |                       |
| CD19-CD22                                | 16 (33.33)        | 3 (20)               |                       |
| CD19-NK                                  | 0 (0)             | 1 (6.67)             |                       |
| CRS                                      |                   |                      | 0.380                 |
| None                                     | 16 (33.33)        | 3 (20)               |                       |
| Grade 1-2                                | 28 (58.33)        | 12 (80)              |                       |
| Grade $\geq$ 3                           | 4 (8.33)          | 0 (0)                |                       |
| NT                                       |                   |                      | 1.000                 |
| None                                     | 40 (83.33)        | 13 (86.67)           |                       |
| Grade 1-2                                | 5 (10.41)         | 2 (13.33)            |                       |
| Grade $\geq$ 3                           | 3 (6.25)          | 0 (0)                |                       |
| Baseline ANC, $\times 10^9/l$            | 2.86 (0.61-11.35) | 4.31 (1.55-7.01)     | 0.005                 |
| Baseline hemoglobin, g/l                 | 106 (51-149)      | 127 (103-165)        | <0.001                |
| Baseline platelet count, $\times 10^9/l$ | 157 (23-359)      | 212 (127-447)        | 0.158                 |
| Baseline CRP, mg/l                       | 18.25 (0.40-200)  | 5.8 (0.4-114.70)     | 0.113                 |
| Baseline ferritin, ng/ml                 | 613.60 (20-25822) | 324.1 (33.10-830)    | 0.014                 |
| Baseline IL-6, pg/l                      | 12.31 (1.50-882)  | 4.24 (1.50-25)       | 0.004                 |

Values are expressed as n (%) or the median (range). CRP, C-reactive protein; CAR-T, chimeric antigen receptor T-cell; ANC, absolute neutrophil count; CRS, cytokine release syndrome; NT, neurological toxicity; NK, natural killer; HSCT, hematopoietic stem cell transplantation; ECOG, Eastern Cooperative Oncology Group.

Table SIII. Analysis of risk factors for anemia above grade 3.

| Characteristic                           | Anemia group       | No anemia group    | Univariate analysis P |
|------------------------------------------|--------------------|--------------------|-----------------------|
| Gender                                   |                    |                    | 0.522                 |
| Male                                     | 13 (81.3)          | 32 (68.1)          |                       |
| Female                                   | 3 (18.8)           | 15 (13.9)          |                       |
| Age, years                               | 46 (23-68)         | 46 (21-72)         | 0.680                 |
| ECOG score                               | 2 (1-3)            | 1 (0-3)            | 0.032                 |
| Number of prior chemotherapies, times    | 9 (3-25)           | 8 (3-26)           | 0.281                 |
| Prior autologous HSCT                    |                    |                    | 1.000                 |
| Yes                                      | 1 (6.3)            | 3 (6.4)            |                       |
| No                                       | 15 (93.8)          | 44 (93.6)          |                       |
| Bone marrow involvement                  |                    |                    | 0.407                 |
| Yes                                      | 3 (18.8)           | 5 (10.6)           |                       |
| No                                       | 13 (81.3)          | 42 (89.4)          |                       |
| Targets of CAR-T cells                   |                    |                    | 0.723                 |
| CD19                                     | 3 (18.8)           | 8 (17)             |                       |
| CD20                                     | 1 (6.3)            | 8 (17)             |                       |
| CD19-CD20                                | 8 (50)             | 15 (31.9)          |                       |
| CD19-CD22                                | 4 (25)             | 15 (31.9)          |                       |
| CD19-NK                                  | 0 (0)              | 1 (2.1)            |                       |
| CRS                                      |                    |                    | 0.132                 |
| None                                     | 2 (12.5)           | 17 (36.2)          |                       |
| Grade 1-2                                | 12 (75)            | 28 (59.6)          |                       |
| Grade $\geq$ 3                           | 2 (12.5)           | 2 (4.3)            |                       |
| NT                                       |                    |                    | 1.000                 |
| None                                     | 13 (81.3)          | 40 (85.1)          |                       |
| Grade 1-2                                | 2 (12.5)           | 5 (10.6)           |                       |
| Grade $\geq$ 3                           | 1 (6.3)            | 2 (4.3)            |                       |
| Baseline ANC, $\times 10^9/l$            | 2.45 (0.71-11.35)  | 3.25 (0.61-7.01)   | 0.522                 |
| Baseline hemoglobin, g/l                 | 80 (51-107)        | 119 (85-165)       | <0.001                |
| Baseline platelet count, $\times 10^9/l$ | 91 (23-301)        | 191 (54-447)       | 0.001                 |
| Baseline CRP, mg/l                       | 56.05 (5-200)      | 5.8 (0.4-200)      | <0.001                |
| Baseline ferritin, ng/ml                 | 1493 (128.5-25822) | 426 (20-1299)      | <0.001                |
| Baseline IL-6, pg/l                      | 25.86 (5.05-882)   | 5.88 (1.50-101.90) | <0.001                |

Values are expressed as n (%) or the median (range). CRP, C-reactive protein; CAR-T, chimeric antigen receptor T-cell; ANC, absolute neutrophil count; CRS, cytokine release syndrome; NT, neurological toxicity; NK, natural killer; HSCT, hematopoietic stem cell transplantation; ECOG, Eastern Cooperative Oncology Group.

Table SIV. Analysis of risk factors for thrombocytopenia above grade 3.

| Characteristic                           | Thrombocytopenia group | No thrombocytopenia group | Univariate analysis P |
|------------------------------------------|------------------------|---------------------------|-----------------------|
| Gender                                   |                        |                           | 0.522                 |
| Male                                     | 12 (80)                | 33 (68.8)                 |                       |
| Female                                   | 3 (20)                 | 15 (31.3)                 |                       |
| Age, years                               | 45 (24-72)             | 46 (21-70)                | 0.910                 |
| ECOG score                               | 2 (1-3)                | 1 (0-3)                   | 0.018                 |
| Number of prior chemotherapies, times    | 8 (3-24)               | 8 (3-26)                  | 0.981                 |
| Prior autologous HSCT                    |                        |                           | 0.238                 |
| Yes                                      | 2 (13.3)               | 2 (4.2)                   |                       |
| No                                       | 13 (86.7)              | 46 (95.8)                 |                       |
| Bone marrow involvement                  |                        |                           | 1.000                 |
| Yes                                      | 2 (13.3)               | 6 (12.5)                  |                       |
| No                                       | 13 (86.7)              | 42 (87.5)                 |                       |
| Targets of CAR-T cells                   |                        |                           | 0.818                 |
| CD19                                     | 3 (20)                 | 8 (16.7)                  |                       |
| CD20                                     | 1 (6.7)                | 8 (16.7)                  |                       |
| CD19-CD20                                | 7 (46.7)               | 16 (33.3)                 |                       |
| CD19-CD22                                | 4 (26.7)               | 15 (31.3)                 |                       |
| CD19-NK                                  | 0 (0)                  | 1 (2.1)                   |                       |
| CRS                                      |                        |                           | 0.047                 |
| None                                     | 1 (6.7)                | 18 (37.5)                 |                       |
| Grade 1-2                                | 13 (86.7)              | 27 (56.3)                 |                       |
| Grade $\geq$ 3                           | 1 (6.7)                | 3 (6.3)                   |                       |
| NT                                       |                        |                           | 0.573                 |
| None                                     | 12 (80)                | 41 (85.4)                 |                       |
| Grade 1-2                                | 2 (13.3)               | 5 (10.4)                  |                       |
| Grade $\geq$ 3                           | 1 (6.7)                | 2 (4.2)                   |                       |
| Baseline ANC, $\times 10^9/l$            | 2.90 (0.71-11.35)      | 3.27 (0.61-7.01)          | 0.345                 |
| Baseline hemoglobin, g/l                 | 81 (51-130)            | 117 (77-165)              | <0.001                |
| Baseline platelet count, $\times 10^9/l$ | 72 (23-262)            | 204 (76-447)              | <0.001                |
| Baseline CRP, mg/l                       | 62.1 (5-200)           | 5.9 (0.4-200)             | 0.001                 |
| Baseline ferritin, ng/ml                 | 1299 (314.2-25822)     | 425.5 (20-3323)           | <0.001                |
| Baseline IL-6, pg/l                      | 26 (5.05-882)          | 5.97 (1.50-147.4)         | <0.001                |

Values are expressed as n (%) or the median (range). CRP, C-reactive protein; CAR-T, chimeric antigen receptor T-cell; ANC, absolute neutrophil count; CRS, cytokine release syndrome; NT, neurological toxicity; NK, natural killer; HSCT, hematopoietic stem cell transplantation; ECOG, Eastern Cooperative Oncology Group.

Table SV. Analysis of the relationship between CRS and thrombocytopenia above grade 3.

| CRS       | Thrombocytopenia group | No thrombocytopenia group | P-value (vs. none) |
|-----------|------------------------|---------------------------|--------------------|
| None      | 1 (5.3)                | 18 (94.7)                 |                    |
| Grade 1-2 | 13 (32.5)              | 27 (67.5)                 | 0.024              |
| Grade 3-4 | 1 (2.5)                | 3 (7.5)                   | 0.324              |

CRS, cytokine release syndrome.
